# Supplementary material for: Robust synthesis of C-terminal cysteine-containing peptide acids through a peptide hydrazide-based strategy
Source: Royal Society of Chemistry journal article supplement (doi:10.1039/c9ob01114e), 2019-01-01
Supplement: c9ob01114e1.pdf [file c9ob01114e1.pdf]

## Supporting Information

### **Robust Synthesis of C-terminal Cysteine-Containing Peptide Acids through A Peptide Hydrazide-Based Strategy**

Chao Zuo,<sup>a,b</sup> Bing-Jia Yan,<sup>b</sup> Han-Ying Zhu,<sup>a</sup> Wei-Wei Shi,<sup>b</sup> Tong-Kuai Xi,<sup>a</sup> Jing Shi,<sup>c\*</sup> Ge-Min Fang<sup>a\*</sup>

<sup>a</sup> *School of Life Science, Institue of Health Science and Technology, Institutes of Physical Science and Information Technology, Anhui University, Hefei 230601, PR China*

<sup>b</sup> *Tsinghua University, Beijing 100084, PR China*

<sup>c</sup> *Department of Chemistry, University of Science and Technology of China, Hefei 230026, PR China*

## **Content**

1. General Information
2. Fmoc SPPS of C-AhPDF 1.1b acid (**1**) using trityl(2-Cl) chloride resin
3. Peptide hydrazide-based preparation of C-AhPDF 1.1b acid (**1**)
4. Peptide hydrazide-based preparation of somatostatin
5. Peptide hydrazide-based preparation of Riparin 1.1b acid
6. Peptide hydrazide-based preparation of Vc 1.1

## 1. General Information

### Materials

*O*-(6-Chlorobenzotriazol-1-yl)-*N,N,N',N'*-tetramethyluronium hexafluorophosphate (HCTU), *O*-(7-azabenzotriazol-1-yl)-*N,N,N',N'*-tetramethyluronium hexafluorophosphate (HATU), and Fmoc-protected amino acids were purchased from GL Biochem (Shanghai, China). 2-Chlorotriyl chloride resin was purchased from Tianjin Nankai Hecheng Science & Technology Co., Ltd (China). 4-Mercaptophenylacetic acid (MPAA), sodium 2-mercaptoethanesulfonate (MESNa), 2-mercaptoethanol ( $\beta$ -ME), and iodine ( $I_2$ ) were purchased from Alfa Aesar. *N,N*-Dimethylformamide (DMF), thioanisole, trifluoroacetic acid (TFA), phenylsilane, acetic acid (HPLC grade), 1,2-ethanedithiol (EDT), reduced glutathione (GSH), oxidized glutathione (GSSG), methanol (MeOH) were purchased from J&K Chemical Ltd. Acetonitrile (HPLC grade) was purchased from J. T. Baker.  $Na_2HPO_4 \cdot 12H_2O$ , guanidine hydrochloride (Gn•HCl), and diethyl ether were purchased from Sinopharm Chemical Reagent Co., Ltd. Dichloromethane (DCM) and sodium nitrite ( $NaNO_2$ ) were purchased from Beijing Chemical Industry Group Co., Ltd. CS136XT synthesizer (automated peptide synthesizer) was purchased from CS Bio Co., Ltd.

### HPLC

Peptide fragments were analyzed by RP-HPLC using analytical columns (Welch XB-C4, 250 mm  $\times$  4.6 mm, 5  $\mu$ m particle size, flow rate 1.0 mL/min, rt) on SHIMADZU instruments (Prominence LC-20AT). They were purified by RP-HPLC using semi-preparative column (Welch XB-C4, 150 mm  $\times$  21.2 mm, 5  $\mu$ m particle size, flow rate 5.0 mL/min, rt) on SHIMADZU instruments (Prominence LC-20AT). Analytical injections were monitored at 214 nm and 254 nm wavelength. **Solvent A**: acetonitrile (containing 0.1% TFA), **Solvent B**: deionized distilled water (containing 0.1% TFA). Both solvents were sonicated for 10 min before use.

### Mass Spectrometry (MS)

Products were identified by electrospray ionization mass spectrometry (ESI-MS). ESI-MS was measured on an Agilent 1200/6340 mass spectrometer in Center of Biomedical Analysis. The buffers for MS analysis were 50%  $CH_3CN/H_2O$  (v/v) containing 0.1% formic acid. MALDI-TOF mass spectra were measured on an Applied Biosystems 4700 Proteomics Analyzer 283.

### Fmoc-based solid-phase peptide synthesis

All peptides were synthesized by running the CS136XT synthesizer on a scale of 0.1 mmol using standard Fmoc-based SPPS protocol. 2-Chlorotriyl chloride resin was used to synthesize C-terminal cysteine-containing peptide acids, and hydrazine 2-chlorotriyl resin was used to synthesize C-terminal cysteine-containing peptide hydrazides. Prior to coupling Fmoc-protected amino acid, the resin was swollen in DMF for 10 min. Coupling of Fmoc-protected amino acid was performed by HATU

(or HCTU)-based method. For most amino acids, single coupling using HATU or HCTU for 30 min is enough, as shown in Table 2A. However, for sterically hindered amino acids, including Fmoc-Thr(tBu)-OH, Fmoc-Asn(Trt)-OH, Fmoc-Gln(Trt)-OH, Fmoc-Arg(Pbf)-OH, Fmoc-Ile-OH, and Fmoc-Val-OH, double coupling was carried out, as shown in Table 2B. For Fmoc deprotection, a solution of 20% piperidine in DMF was used (twice, 10 min+10min). After assembly of amino acids, the resin was treated by TFA cocktail (TFA/thioanisole/EDT/phenol/H<sub>2</sub>O, 85/5/5/2.5/2.5) for 2.5 h at room temperature. The combined TFA solutions was concentrated by N<sub>2</sub> blowing. Crude peptides were precipitated with cold diethyl ether, and obtained as a white powder after centrifugation. The crude peptides were dissolved in a mixed solution containing water (containing 0.1% TFA) and acetonitrile (containing 0.1% TFA). After analyzing by HPLC and MS, the desired peptides were purified by preparative HPLC, and lyophilized to a white powder.

## 2. Fmoc SPPS of C-AhPDF 1.1b acid (1) using trityl(2-Cl) chloride

### resin

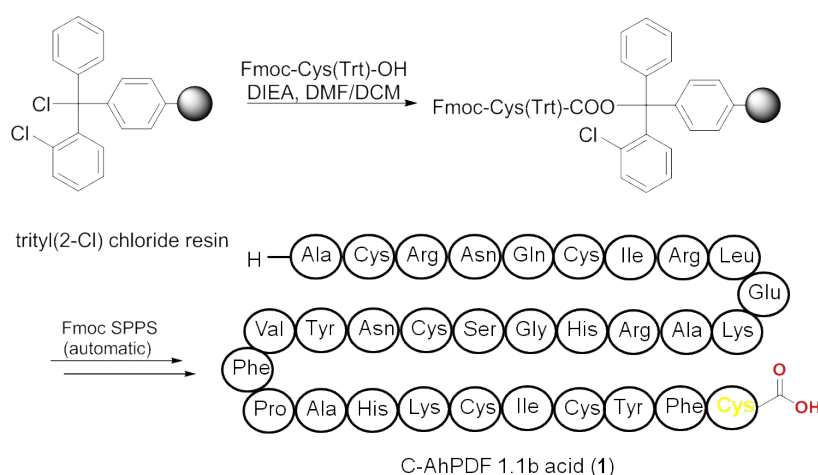

**Scheme S1.** Fmoc SPPS of C-AhPDF 1.1b acid (1) using trityl(2-Cl) chloride resin

The linear C-AhPDF 1.1b acid (1) was assembled by running the CS136XT synthesizer on a scale of 0.1 mmol using trityl(2-Cl) chloride resin and standard Fmoc-based SPPS protocol. After the assembly of C-AhPDF 1.1b on the solid support, C-AhPDF 1.1b acid (1) was cleaved from the resin by TFA cocktail (TFA/thioanisole/EDT/phenol/H<sub>2</sub>O, 85/5/5/2.5/2.5) for 2.5 h at room temperature. The crude C-AhPDF 1.1b acid (1) was precipitated by cold ether, and obtained as a white powder. Crude C-AhPDF 1.1b acid (1) was analyzed by analytic HPLC and ESI-MS, as shown in Figure S1.

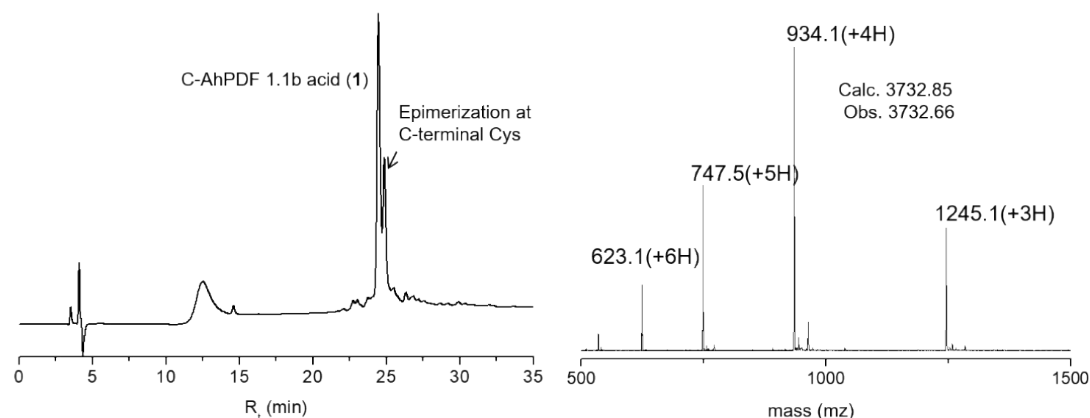

**Figure S1.** Analytic HPLC trace (210 nm) and ESI-MS of crude C-AhPDF 1.1b acid (**1**) prepared by using trityl(2-Cl) resin. (gradient: 5-5% **Solvent A** in 2 min, then 20-40% **Solvent A** in 30 min).

### 3. Peptide hydrazide-based preparation of C-AhPDF 1.1b acid (**1**)

Preparation of hydrazine-trityl(2-Cl) resin

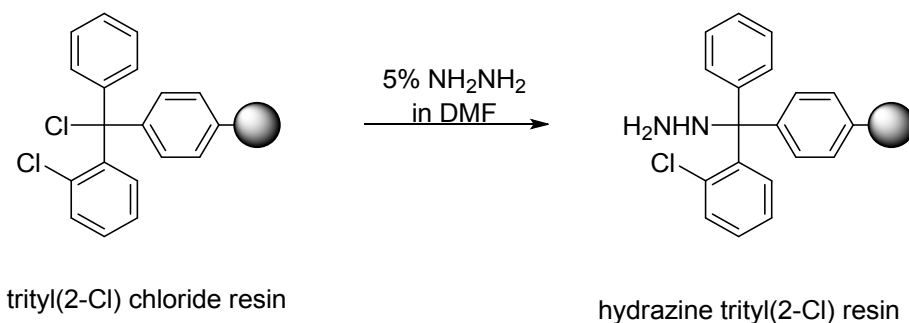

**Scheme S2.** Preparation of hydrazine-trityl(2-Cl) resin.

250 mg trityl(2-Cl) chloride resin (0.1 mmol, 0.40 mmol/g) was swollen in DMF (10 mL) for 15 min, then was treated by a solution of 5%  $\text{NH}_2\text{NH}_2$  in N, N-dimethylformamide (0.5 mL 80% hydrazine in 7.5 mL DMF, 30 min x2) to afford hydrazine trityl(2-Cl) resin, as shown in Scheme S2. Then, 10 mL methanol was added to the resin to quench unreacted trityl(2-Cl) chloride, 20 min, RT. After washing by DMF/DCM/DMF, the obtained resin was directly used for the preparation of C-terminal Cys-containing peptide hydrazides.

## Preparation of C-AhPDF1.1b hydrazide (**2**)

C-AhPDF 1.1b hydrazide (**2**) was synthesized on 0.1 mmol scale. Isolation yield: (195 mg, 52  $\mu$ mol, 52 %). HPLC:  $t_R$  = 22.6 min (gradient: 5-5% B in 2 min, then 20-40% B in 30 min). ESI-MS: obs. 3746.17 m/z (deconv.), calc. 3746.41.

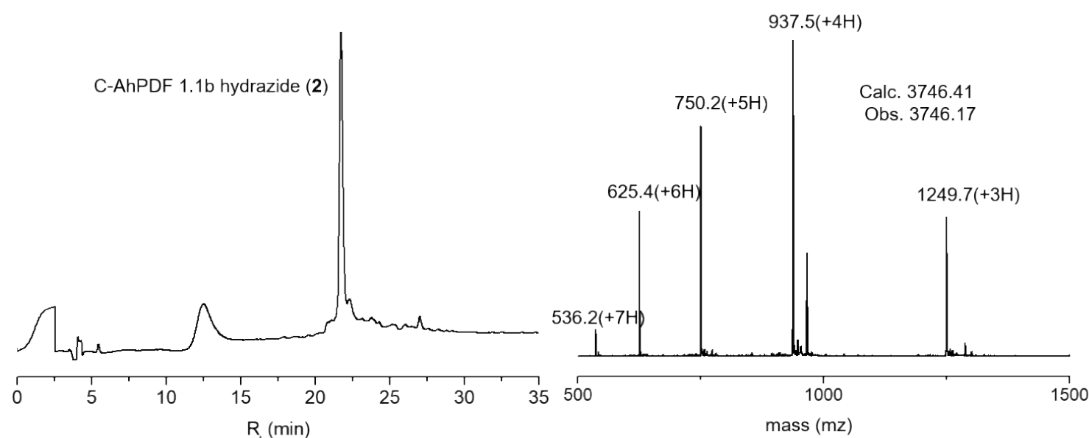

**Figure S2.** Analytic HPLC trace (210 nm) and ESI-MS of crude C-AhPDF 1.1b hydrazide (**2**) (gradient: 5-5% **Solvent A** in 2 min, then 20-40% **Solvent A** in 30 min).

## Hydrolysis of C-AhPDF1.1b MESNa-thioester (pH 8)

C-AhPDF 1.1b hydrazide ( 3.75 mg, 1.0  $\mu$ mol) was added to 0.25 mL of PBS buffer (0.2 M  $\text{Na}_2\text{HPO}_4$ , 6 M  $\text{Gn}\cdot\text{HCl}$ , pH 3). At -10  $^\circ\text{C}$ , 10 equivalents of  $\text{NaNO}_2$  (20  $\mu\text{L}$ , 0.01 mM in pH3 PBS ) were added dropwise. After 20 min, 200 equivalents of MESNa (0.25 mL, 800 mM in pH 8 PBS) was added. Then, the pH value of the solution was adjusted to 8 with NaOH (0.2 M) at room temperature. After 1 h, the reaction mixture was monitored by HPLC and analyzed by ESI-MS, as shown in Figure S3.

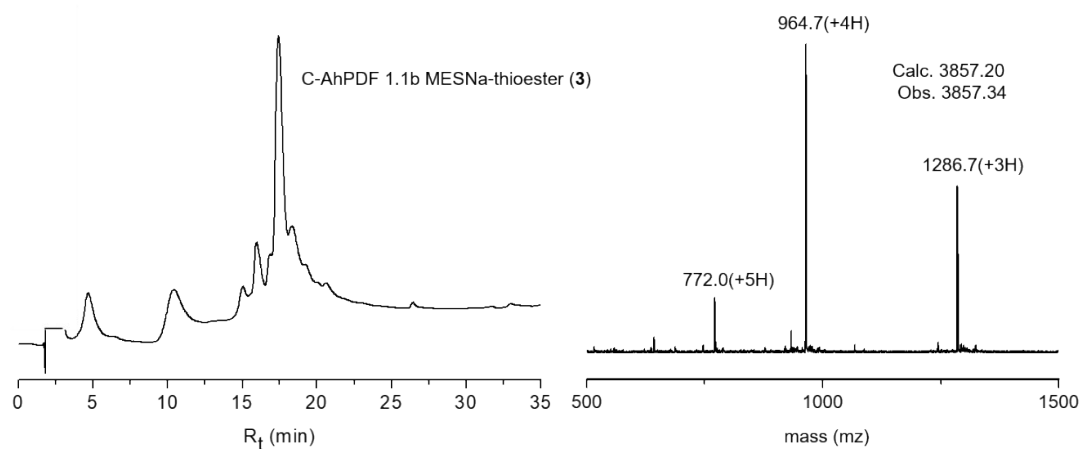

**Figure S3.** HPLC analysis (210nm) of reaction of hydrolysis of C-AhPDF 1.1b MESNa-thioester (**3**) and ESI-MS of **3** (gradient: 5-5% **Solvent A** in 2 min, then 20-

50% **Solvent A** in 30 min).

### Hydrolysis of C-AhPDF1.1b MPAA-thioester (pH 8)

C-AhPDF 1.1b hydrazide ( 3.75 mg, 1.0  $\mu\text{mol}$ ) was added to 0.25 mL of PBS buffer (0.2 M  $\text{Na}_2\text{HPO}_4$ , 6 M  $\text{Gn}\cdot\text{HCl}$ , pH 3). At  $-10\text{ }^\circ\text{C}$ , 10 equivalents of  $\text{NaNO}_2$  (20  $\mu\text{L}$ , 0.01 mM in pH3 PBS ) were added dropwise. After 20 min, 200 equivalents of MPAA (0.25 mL, 800 mM in pH8 PBS) was added. Then, the pH value of the solution was adjusted to 8 with  $\text{NaOH}$  (0.2 M) at room temperature. After 1 h, the reaction mixture was monitored by HPLC and analyzed by ESI-MS, as shown in Figure S4.

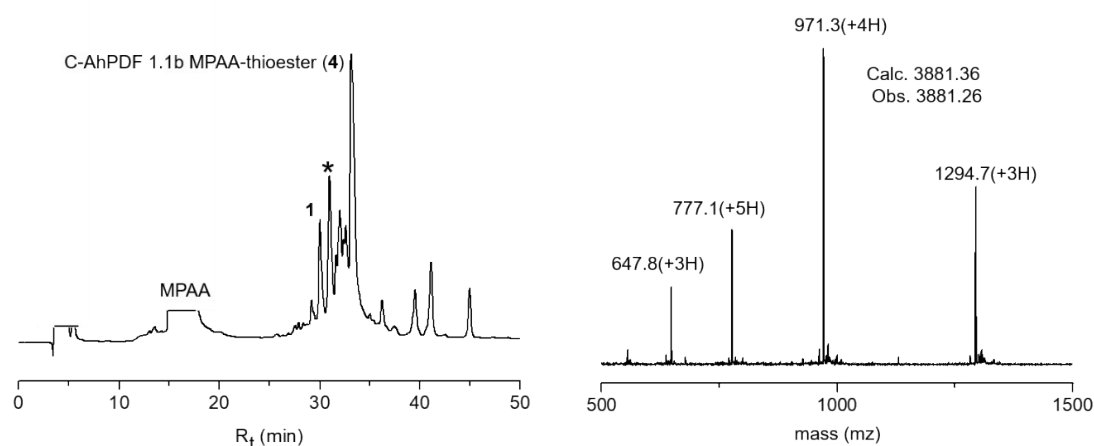

**Figure S4.** HPLC analysis (210nm) of reaction of hydrolysis of C-AhPDF 1.1b MPAA-thioester (1 h, 400 mM MPAA) and ESI-MS of **4**. \* denotes the remaining C-AhPDF 1.1b hydrazide (**2**). (gradient: 5-5% **Solvent A** in 2 min, 20-20% **Solvent A** in 10 min, then 20-50% **Solvent A** in 30 min).

### Hydrolysis of C-AhPDF1.1b MESNa-thioester by MPAA (pH 8)

C-AhPDF1.1b hydrazide (3.75 mg, 1.0  $\mu\text{mol}$ ) was added to 0.25 mL of PBS buffer (0.2 M  $\text{Na}_2\text{HPO}_4$ , 6 M  $\text{Gn}\cdot\text{HCl}$ , pH 3). At  $-10\text{ }^\circ\text{C}$ , 10 equivalents of  $\text{NaNO}_2$  (20  $\mu\text{L}$ , 0.01 mM in pH 3 PBS) were added. After 20 min, 20 equivalents of MPAA (125  $\mu\text{L}$ , 0.16 M in PBS) was added at room temperature. After 5 min, 200 equivalents of MESNa (125  $\mu\text{L}$ , 1.6 M in pH 8) was added into the reaction mixture, and pH value of the solution was adjusted to 8. After 1 h, the reaction mixture was monitored by HPLC and analyzed by MS, as shown in Figure S5.

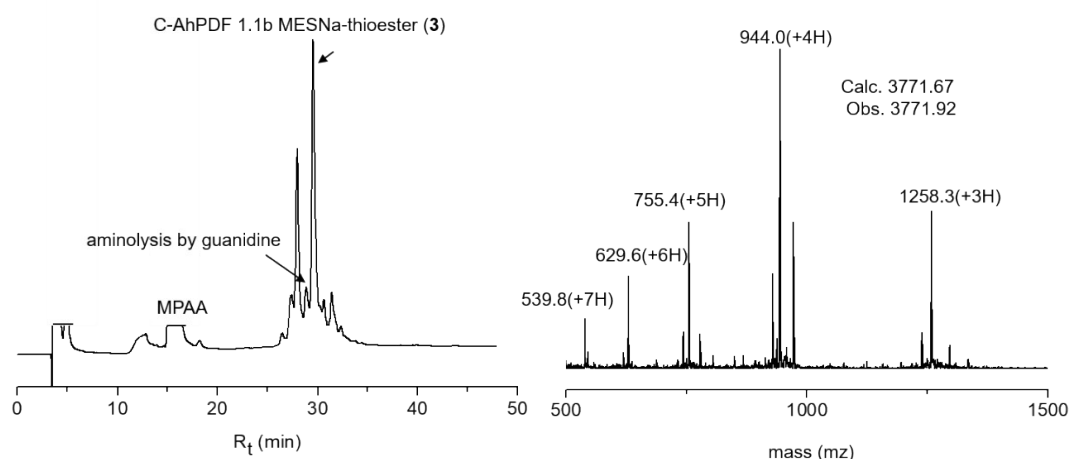

**Figure S5.** HPLC analysis (210 nm) of reaction of hydrolysis of C-AhPDF 1.1b MPAA-thioester (1 h, 400 mM MESNa) and ESI-MS of the side product of aminolysis of thioester by guanidine. (gradient: 5-5% **Solvent A** in 2 min, 20-20% **Solvent A** in 10 min, then 20-50% **Solvent A** in 30 min).

### Mercaptoethanol-mediated hydrolysis of C-AhPDF1.1b thioester (pH 8)

C-AhPDF1.1b hydrazide (3.75 mg, 1.0  $\mu$ mol) was added to 0.25 mL of PBS buffer (0.2 M  $\text{Na}_2\text{HPO}_4$ , 6 M  $\text{Gn}\cdot\text{HCl}$ , pH 3). At  $-10^\circ\text{C}$ , 10 equivalents of  $\text{NaNO}_2$  (20  $\mu\text{L}$ , 0.01 mM in pH 3 PBS) were added. After 20 min, 200 equivalents of 2-mercaptoethanol (250  $\mu\text{L}$ , 0.8 M in pH 8 PBS) was added into the reaction mixture, and pH value of the solution was adjusted to 8. After 1 h, the reaction mixture was monitored by HPLC and analyzed by MS, as shown in Figure S6.

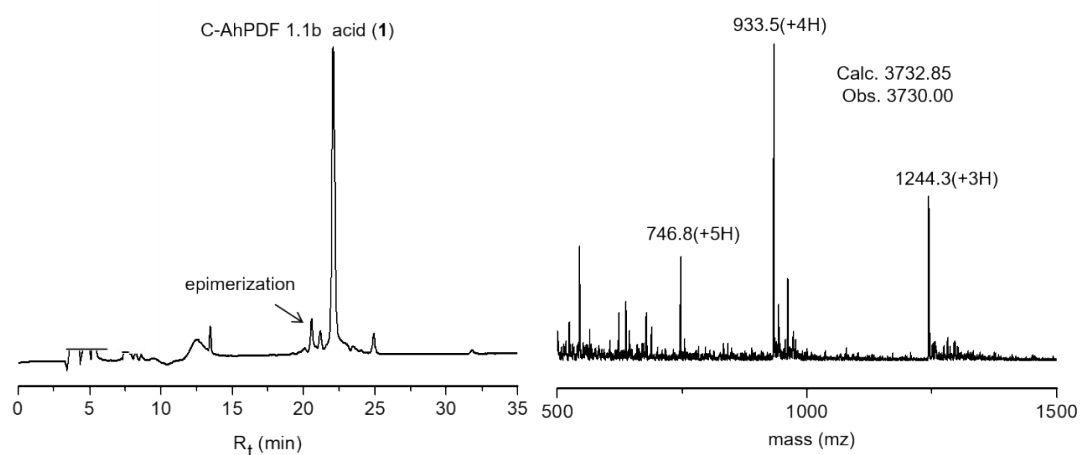

**Figure S6.** HPLC analysis (210 nm) of reaction of mercaptoethanol-mediated hydrolysis of C-AhPDF 1.1b thioester (1 h, 400 mM mercaptoethanol) and ESI-MS of racemized C-AhPDF 1.1b acid. (gradient: 5-5% **Solvent A** in 2 min, then 20-50% **Solvent A** in 30 min)



C-AhPDF1.1b hydrazide (3.75 mg, 1.0  $\mu\text{mol}$ ) was added to 0.25 mL of PBS buffer (0.2 M  $\text{Na}_2\text{HPO}_4$ , 6 M  $\text{Gn}\cdot\text{HCl}$ , pH 3). At  $-10\text{ }^\circ\text{C}$ , 10 equivalents of  $\text{NaNO}_2$  (20  $\mu\text{L}$ , 0.01 mM in pH 3 PBS) were added. After 20 min, 20 equivalents of MPAA (125  $\mu\text{L}$ , 0.16 M in PBS) was added at room temperature. After 5 min, 200 equivalents of 2-mercaptoethanol (125  $\mu\text{L}$ , 1.6 M in pH8 PBS) was added into the reaction mixture, and pH value of the solution was adjusted to 8. After 1 h, the reaction mixture was monitored by HPLC and analyzed by MS, as shown in Figure S7. By HPLC, the conversion yield was determined to be 98%.

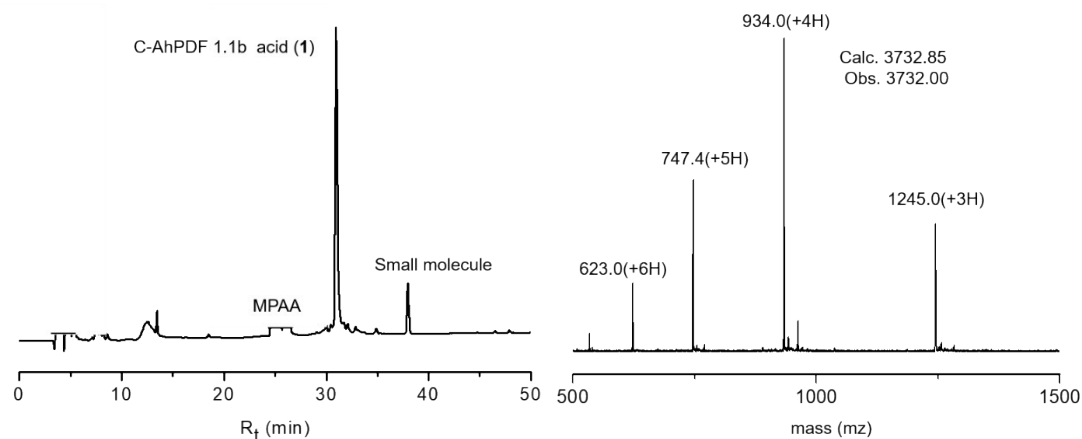

**Figure S7.** HPLC analysis (210 nm) of reaction of mercaptoethanol-mediated hydrolysis of C-AhPDF 1.1b MPAA thioester (1 h, 40 mM MPAA, 400 mM mercaptoethanol) and ESI-MS of the desired C-AhPDF 1.1b acid (1). (gradient: 5-5% **Solvent A** in 2 min, 20-20% **Solvent A** in 10 min, then 20-50% **Solvent A** in 30 min).

#### 4. Peptide hydrazide-based preparation of somatostatin

##### Preparation of somatostatin hydrazide (**6**)

Somatostatin hydrazide (**6**) was synthesized on 0.1 mol scale. Isolation yield: (79 mg, 48  $\mu$ mol, 48 %). HPLC:  $t_R$  = 17.6 min (gradient: 5-5%B in 2 min, then 20-40%B in 30 min). ESI-MS: obs. 1653.72 m/z (deconv.), calc. 1653.90.

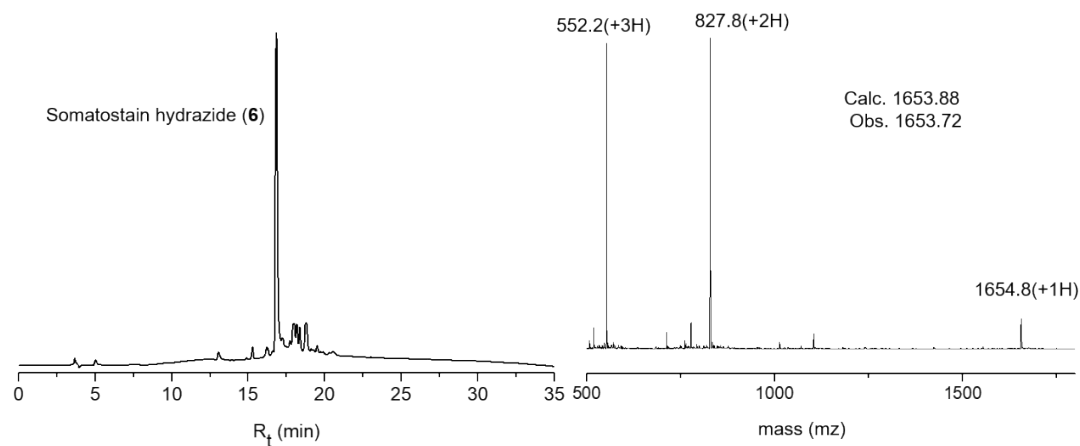

**Figure S8.** Analytic HPLC trace (210 nm) and ESI-MS of crude somatostatin hydrazide (**6**). (gradient: 5-5% **Solvent A** in 2 min, then 5-95% **Solvent A** in 30 min).

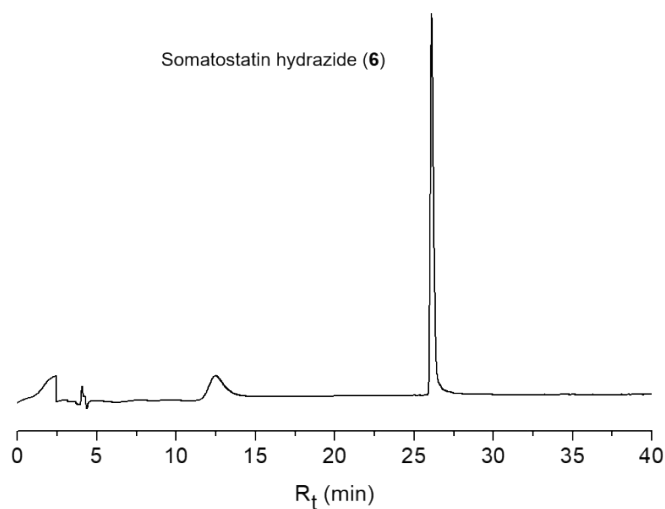

**Figure S9.** Analytic HPLC trace (210 nm) of purified somatostatin hydrazide (**6**) (gradient: 5-5% **Solvent A** in 2 min, then 20-40% **Solvent A** in 30 min).

## Mercaptoethanol-mediated synthesis of somatostatin acid (7)

Somatostatin hydrazide (**6**) (1.7 mg, 1.0  $\mu\text{mol}$ ) was added to 0.25 mL of PBS buffer (0.2 M  $\text{Na}_2\text{HPO}_4$ , 6 M  $\text{Gn}\cdot\text{HCl}$ , pH 3). At  $-10\text{ }^\circ\text{C}$ , 10 equivalents of  $\text{NaNO}_2$  (20  $\mu\text{L}$ , 0.01 mM in pH 3 PBS) were added. After 20 min, 20 equivalents of MPAA (125  $\mu\text{L}$ , 0.16 M in PBS, with final pH value of 5) were added at room temperature. After 5 min, 200 equivalents of 2-mercaptoethanol (125  $\mu\text{L}$ , 1.6 M in PBS) was added, and pH value of the solution was adjusted to 8. After 1 h, the reaction mixture was monitored by HPLC and analyzed by MS. By analytic HPLC, the conversion yield was determined to be 98%. The somatostatin acid (**7**) was isolated by semi-preparative HPLC and lyophilized to a white powder, giving an isolation yield of ~72% (1.18 mg, 0.72  $\mu\text{mol}$ ).

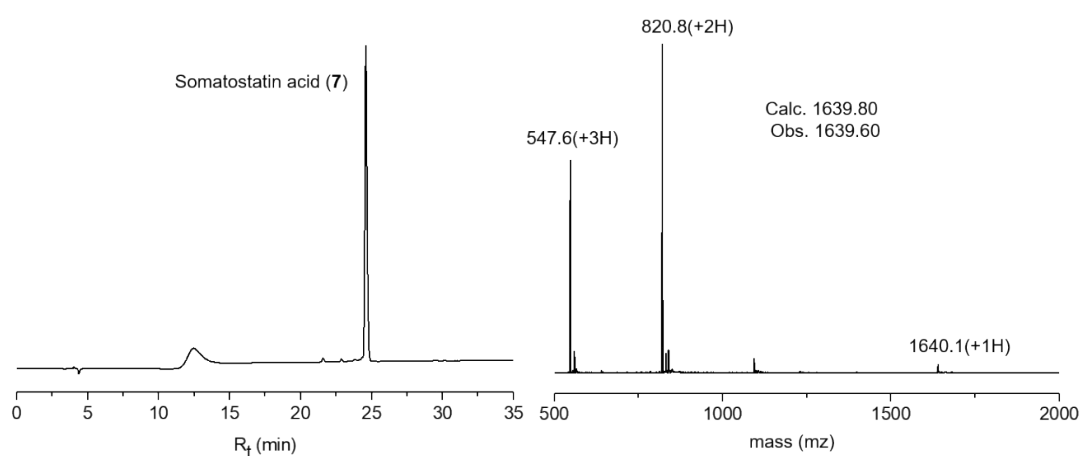

**Figure S10.** Analytic HPLC trace (210 nm) and ESI-MS of purified somatostatin acid (**7**) (gradient: 5-5% **Solvent A** in 2 min, then 20-50% **Solvent A** in 30 min).

## $\text{I}_2$ -mediated folding of somatostatin acid (**7**)

Somatostatin acid (**7**) (1.0 mg, 0.6  $\mu\text{mol}$ ) was dissolved into a mixture solution (500  $\mu\text{L}$  AcOH and 100  $\mu\text{L}$   $\text{H}_2\text{O}$ ). Then, 10 equivalents of  $\text{I}_2$  in 15  $\mu\text{L}$  MeOH were added, and the reaction was incubated at room temperature for 2 h and the reaction quenched by addition of 1 M ascorbic acid until the mixture became colorless. The folded somatostatin was isolated by semi-preparative HPLC and lyophilized to a white powder, giving an isolation yield of ~68% (0.67 mg, 0.41  $\mu\text{mol}$ ).

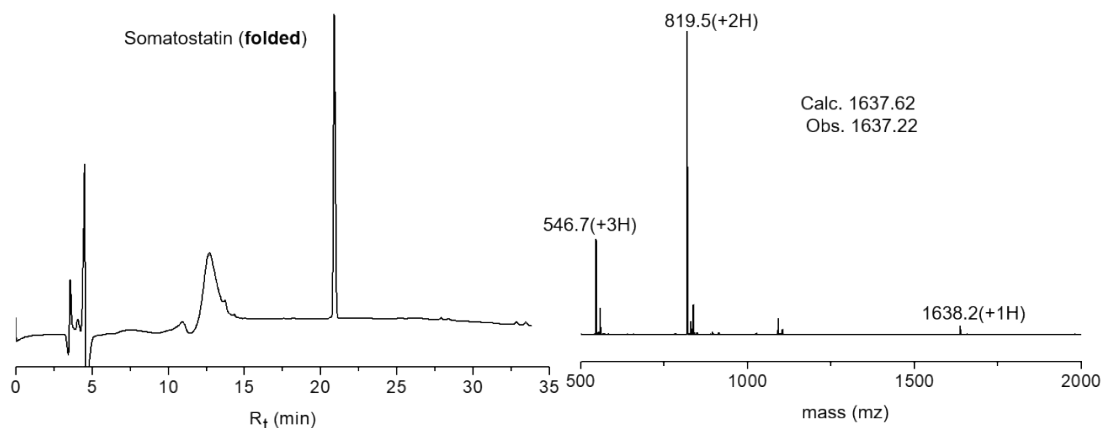

**Figure S11.** Analytic HPLC trace (210 nm) and ESI-MS of purified somatostatin (gradient: 5-5% **Solvent A** in 2 min, then 20-70% **Solvent A** in 30 min).

## 5. Peptide hydrazide-based preparation of Riparin 1.1b acid

### Preparation of Riparin 1.1b hydrazide

Riparin 1.1b hydrazide was synthesized on 0.1 mol scale. Isolation yield: (68 mg, 56  $\mu$ mol, 56 %). HPLC:  $t_R$  = 14.5 min (gradient: 5-5% in 2 min, then 5-95% B in 30 min). ESI-MS: obs. 1212.72 m/z (deconv.), calc. 1212.45.

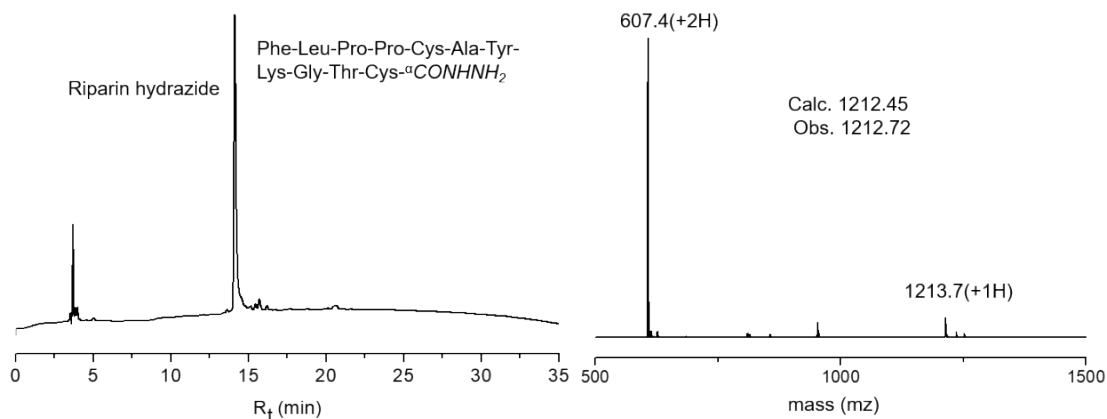

**Figure S12.** Analytic HPLC trace (210 nm) and ESI-MS of crude Riparin 1.1b hydrazide (gradient: 5-5% **Solvent A** in 2 min, then 5-95% **Solvent A** in 30 min).

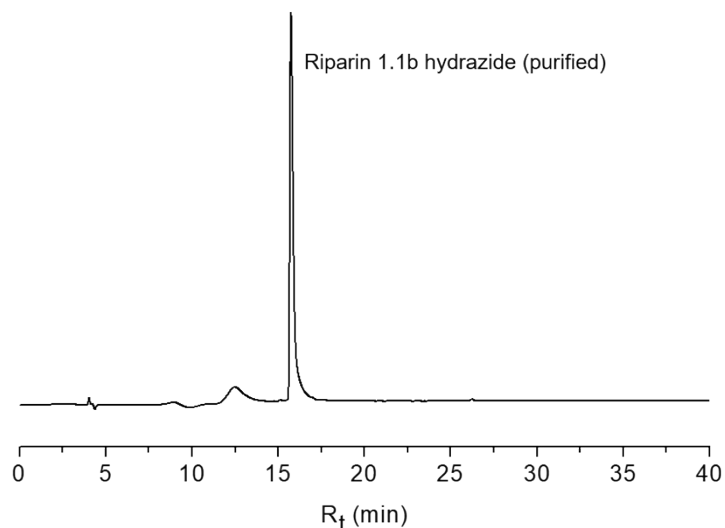

**Figure S13.** Analytic HPLC trace (210nm) of purified Riparin hydrazide (gradient: 5-5% **Solvent A** in 2 min, then 20-40% **Solvent A** in 30 min).

### Mercaptoethanol-mediated synthesis of Riparin 1.1b

Riparin 1.1b hydrazide (1.2 mg, 1.0  $\mu\text{mol}$ ) was added to 0.25 mL of PBS buffer (0.2 M  $\text{Na}_2\text{HPO}_4$ , 6 M  $\text{Gn}\cdot\text{HCl}$ , pH 3). At  $-10\text{ }^\circ\text{C}$ , 10 equivalents of  $\text{NaNO}_2$  (20  $\mu\text{L}$ , 0.01 mM in pH 3 PBS) were added. After 20 min, 20 equivalents of MPAA (125  $\mu\text{L}$ , 0.16 M in PBS, with final pH value of 5) were added at room temperature. After 5 min, 200 equivalents of 2-mercaptoethanol (125  $\mu\text{L}$ , 1.6 M in PBS) was added, and pH value of the solution was adjusted to 8. After 1 h, the reaction mixture was monitored by HPLC and analyzed by MS. By analytic HPLC, 98% of Riparin 1.1b hydrazide has been converted to Riparin 1.1b acid. The Riparin 1.1b acid was isolated by semi-preparative HPLC and lyophilized to a white powder, giving an isolation yield of  $\sim 71\%$  (0.9 mg, 0.7  $\mu\text{mol}$ ).

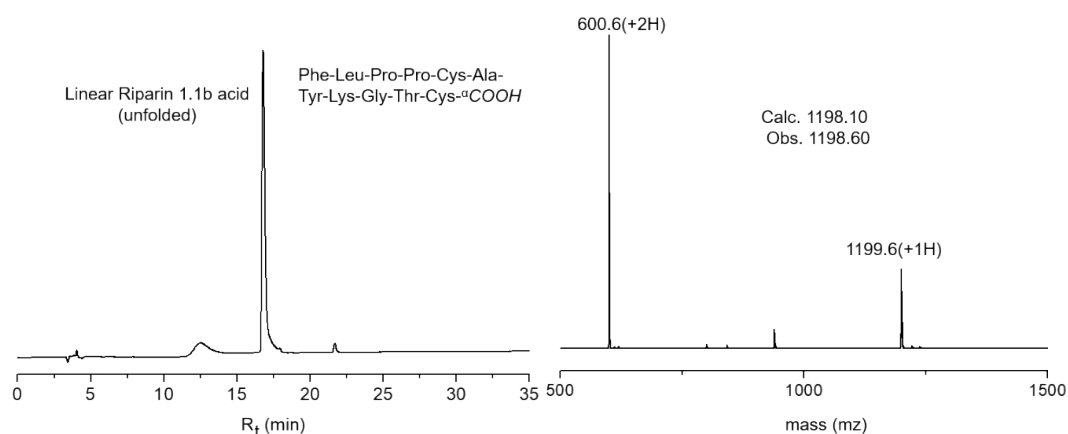

**Figure S14.** Analytic HPLC trace (210nm) of purified Riparin 1.1 b acid (gradient: 5-5% **Solvent A** in 2 min, then 20-50% **Solvent A** in 30 min).

## Folding of somatostatin acid Riparin 1.1b acid

The Riparin 1.1b acid (1.2 mg, 1.0  $\mu\text{mol}$ ) was dissolved in 12 mL PBS buffer (50 mM  $\text{Na}_2\text{HPO}_4$ , 8 mM GSSG, 1 mM GSH, pH 7.5), with a protein concentration of 0.1 mg/mL. Then, the reaction mixture was stirred at room temperature for 6 hours. After HPLC purification and lyophilization, corrected folded Riparin 1.1b was obtained as a white powder, giving an isolation yield of ~65% (0.8 mg, 0.65  $\mu\text{mol}$ ).

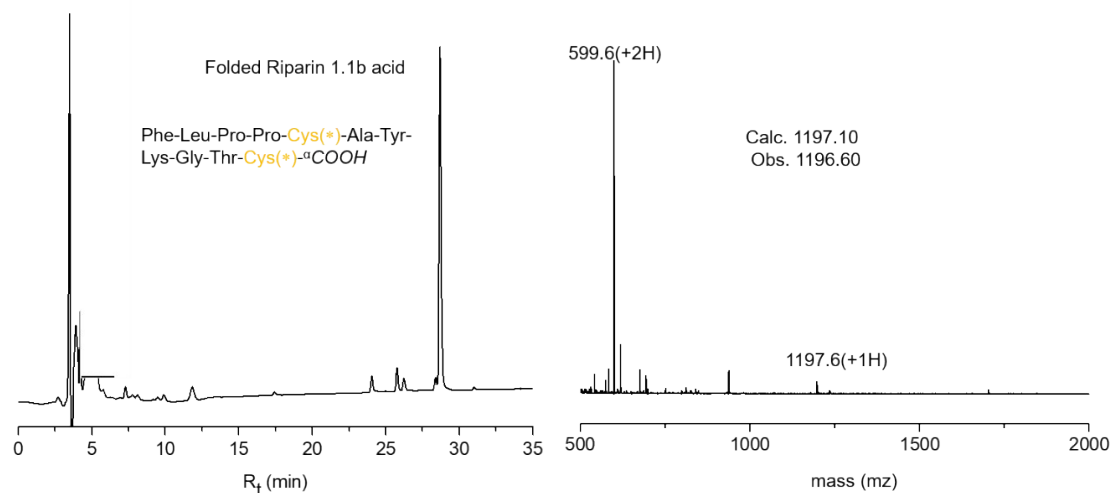

**Figure S15.** HPLC analysis (210 nm) and ESI-MS of the folded Riparin 1.1b acid (6 h, 8 Mm GSSG, 1 Mm GSH), with a disulfide bond formed between  $^5\text{Cys}(*)$  and  $^{11}\text{Cys}(*)$  (gradient: 5-5% **Solvent A** in 2 min, then 20-40% **Solvent A** in 30 min).

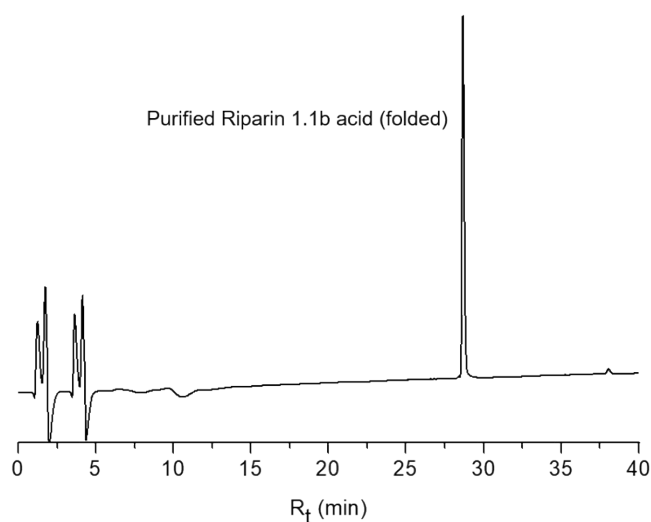

**Figure S16.** Analytic HPLC trace (210 nm) of purified Riparin 1.1b (gradient: 5-5% **Solvent A** in 2 min, then 20-40% **Solvent A** in 30 min).

## 6. Peptide hydrazide-based preparation of Vc 1.1 acid

### Preparation of Vc 1.1 hydrazide (**8**)

$\alpha$ -conotoxin Vc 1.1 hydrazide (**8**) was synthesized on 0.1 mol scale. Isolation yield: (104 mg, 53  $\mu$ mol, 53 %). HPLC:  $t_R$  = 13.5 min (gradient: 5-5% in 2 min, then 20-70%B in 30 min). ESI-MS: obs. 1967.18 m/z (deconv.), calc. 1968.20.

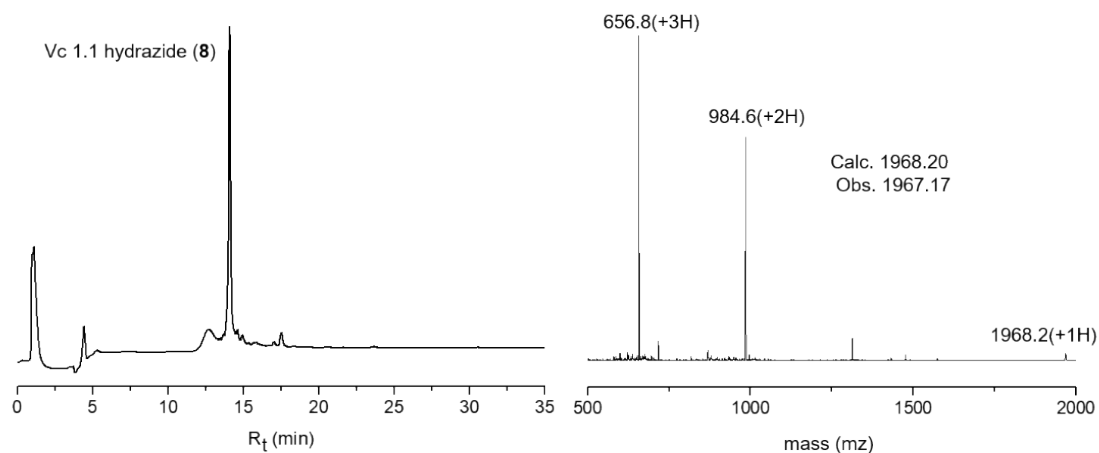

**Figure S17.** Analytic HPLC trace (210 nm) and ESI-MS of crude Vc 1.1 hydrazide (**8**) (gradient: 5-5% **Solvent A** in 2 min, then 20-70% **Solvent A** in 30 min).

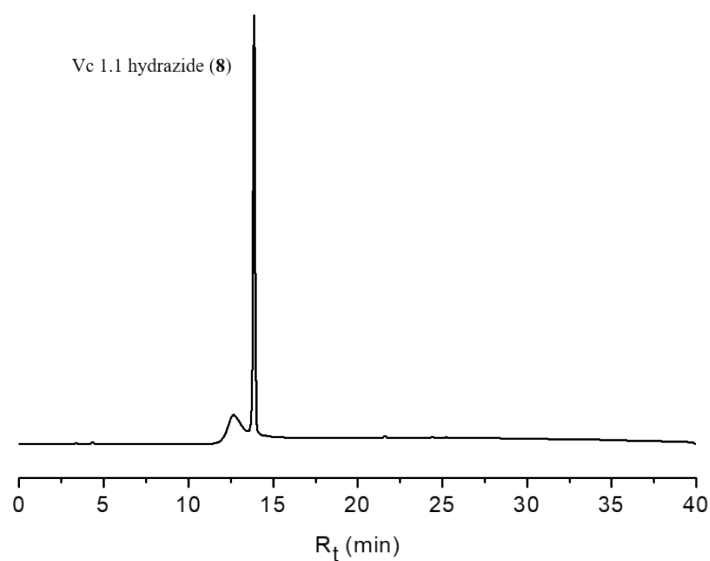

**Figure S18.** Analytic HPLC trace (210nm) of purified Vc 1.1 hydrazide (**8**) (gradient: 5-5% **Solvent A** in 2 min, then 20-70% **Solvent A** in 30 min).

## Mercaptoethanol-mediated synthesis of $\alpha$ -conotoxin Vc1.1 acid

Vc1.1 hydrazide (**8**) (2.0 mg, 1.0  $\mu$ mol) was added to 0.25 mL of PBS buffer (0.2 M  $\text{Na}_2\text{HPO}_4$ , 6 M  $\text{Gn}\cdot\text{HCl}$ , pH 3). At  $-10\text{ }^\circ\text{C}$ , 10 equivalents of  $\text{NaNO}_2$  (20  $\mu\text{L}$ , 0.01 mM in pH3 PBS) were added. After 20 min, 20 equivalents of MPAA (125  $\mu\text{L}$ , 0.16 M in PBS, with final pH value of 5) were added at room temperature. After 5 min, 200 equivalents of 2-mercaptoethanol (125  $\mu\text{L}$ , 1.6 M in PBS) was added, and pH value of the solution was adjusted to 8. After 1 h, the reaction mixture was monitored by HPLC and analyzed by MS. By analytic HPLC, the conversion yield was determined to be 98%. The Vc 1.1 acid (**9**) was isolated by semi-preparative HPLC and lyophilized to a white powder, giving an isolation yield of  $\sim 68\%$  (1.3 mg, 0.68  $\mu$ mol).

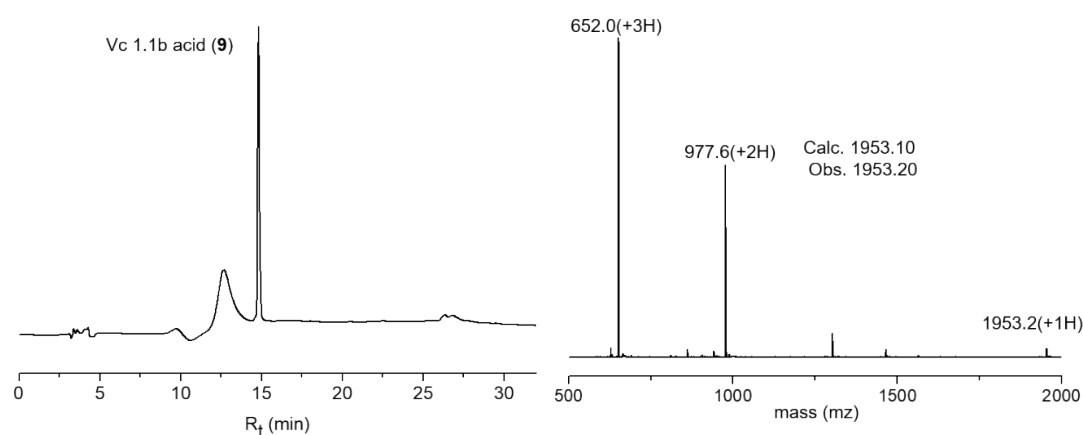

**Figure S19.** Analytic HPLC trace (210nm) and ESI-MS of purified Vc 1.1 acid (**9**) (gradient: 5-5% **Solvent A** in 2 min, then 20-70% **Solvent A** in 30 min).



The Vc 1.1 acid (**9**) (2.0 mg, 1.0  $\mu\text{mol}$ ) was dissolved in PBS buffer (50 mM  $\text{Na}_2\text{HPO}_4$ , 8 mM GSSG, 1 mM GSH, pH 7.5), with a protein concentration of 0.1 mg/mL. Then, the reaction mixture was stirred at room temperature. After 6 h, the reaction mixture was monitored by HPLC and analyzed by MS. The conversion yield of this step was determined to be 82%. After HPLC purification and lyophilization, partially folded Vc 1.1 (**10**) was obtained as a white powder, giving an isolation yield of ~51% (1.0 mg, 0.5  $\mu\text{mol}$ ).

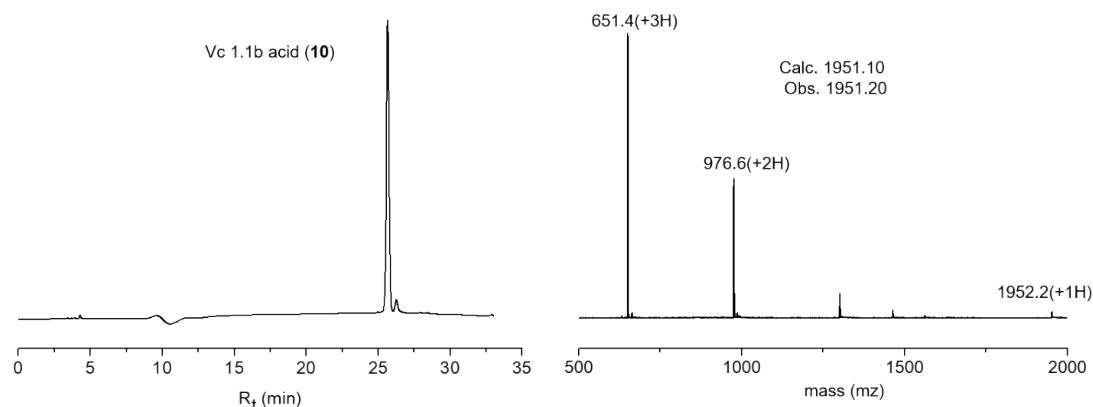

**Figure S20.** Analytic HPLC trace (210nm) and ESI-MS of purified Vc 1.1 acid (**10**) (gradient: 5-5% **Solvent A** in 2 min, then 20-40% **Solvent A** in 30 min).

The partially folded Vc 1.1 (**10**) (1.0 mg, 0.5  $\mu\text{mol}$ ) was dissolved into a mixture solution (500  $\mu\text{L}$  AcOH and 100  $\mu\text{L}$   $\text{H}_2\text{O}$ ). Then, 10 equivalents of  $\text{I}_2$  in 15  $\mu\text{L}$  MeOH were added, and the reaction was incubated at room temperature for 2 h and the reaction quenched by addition of 1 M ascorbic acid until the mixture became colorless. The folded Vc 1.1 was isolated by semi-preparative HPLC and lyophilized to a white powder, giving an isolation yield of ~71% (0.64 mg, 0.36  $\mu\text{mol}$ ).

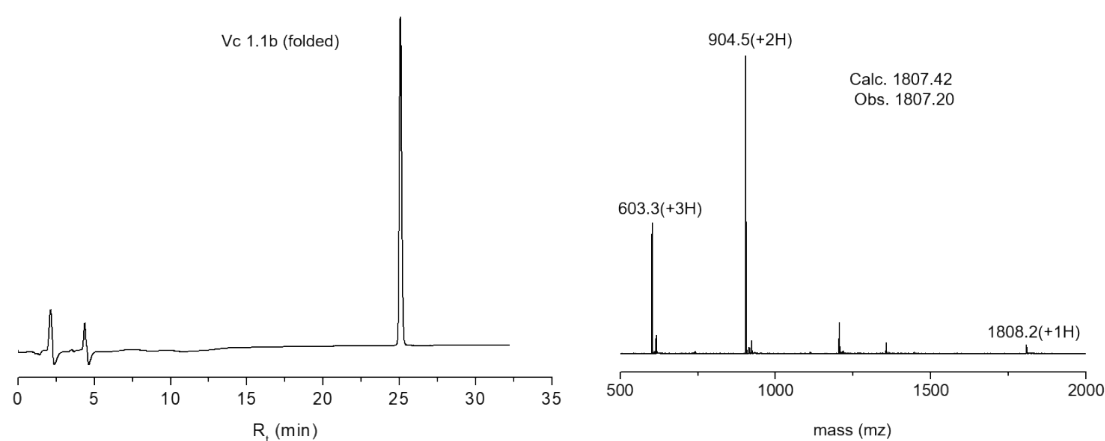

**Figure S21.** Analytic HPLC trace (210 nm) and ESI-MS of purified Vc 1.1 (gradient: 5-5% **Solvent A** in 2 min, then 20-40% **Solvent A** in 30 min).
